# Supplementary material for: Iron cation-induced biphase symbiosis of h-WO3/o-WO3·0.33H2O and their crystal phase transition
Source: Royal Society of Chemistry journal article supplement (doi:10.1039/c7ce00774d), 2017-01-01
Supplement: c7ce00774d1.pdf [file c7ce00774d1.pdf]

## Supporting information

### Iron cations induced biphasic symbiosis of h-WO<sub>3</sub>/o-WO<sub>3</sub>·0.33H<sub>2</sub>O and their crystal phase transition

Huixiang Wang,<sup>abc</sup> Ruimin Ding,<sup>ab</sup> Conghui Wang,<sup>abc</sup> Xiaobo Ren,<sup>abc</sup> Liancheng

Wang<sup>\*ab</sup> and Baoliang Lv<sup>\*ab</sup>

<sup>a</sup> State Key Laboratory of Coal Conversion, Institute of Coal Chemistry, Chinese Academy of Sciences, Taiyuan 030001, China. E-mail: lhl604@sxicc.ac.cn; Fax: +86-351-4041153; Tel: +86-351-4063121

<sup>b</sup> Key Laboratory of Carbon Materials, Institute of Coal Chemistry, Chinese Academy of Sciences, Taiyuan 030001, China

<sup>c</sup> University of Chinese Academy of Sciences, Beijing 100049, China

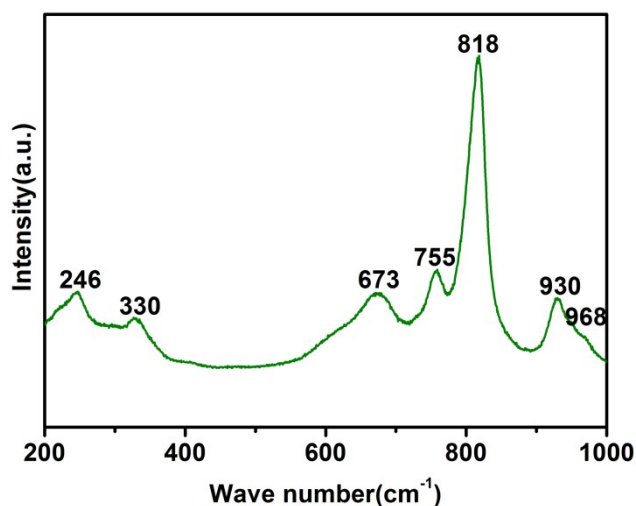

**Fig. S1** The Raman spectrum of WFe0 (pure WO<sub>3</sub>) sample.

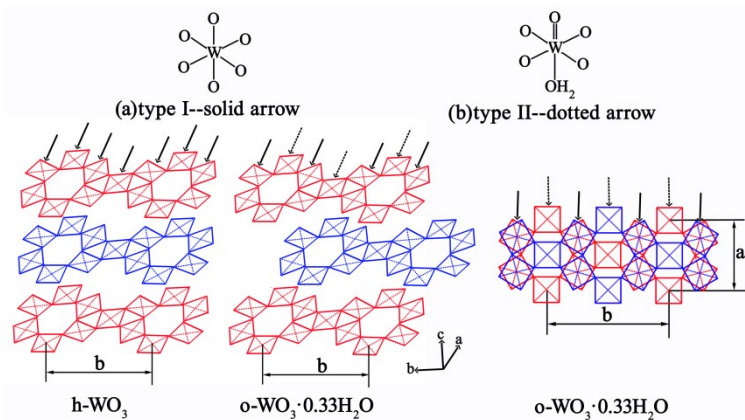

**Fig. S2** Schematic illustration of h-WO<sub>3</sub> and o-WO<sub>3</sub>·33H<sub>2</sub>O structure (the second layer is shown with blue color).

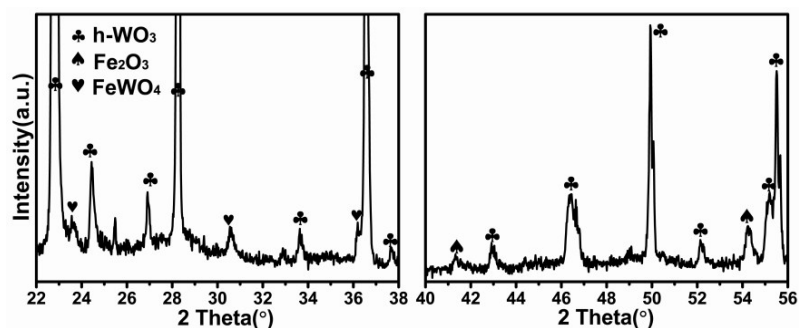

**Fig. S3** The XRD patterns of enlarged areas for WFe0.20.

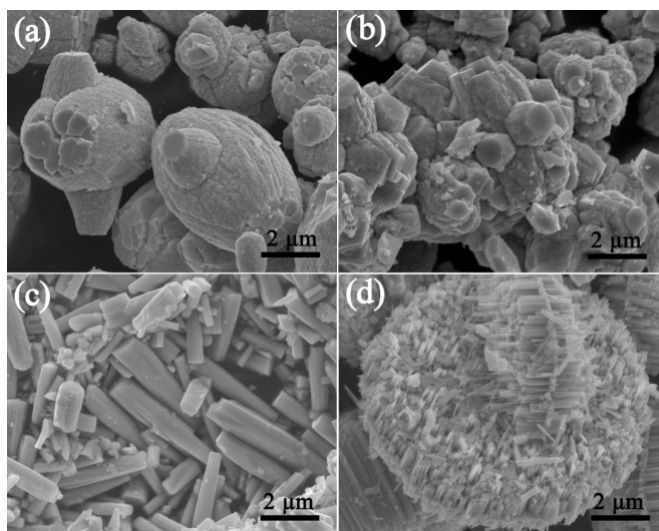

**Fig. S4** The SEM images of samples with different nitrates: (a) Ni(NO<sub>3</sub>)<sub>2</sub>·6H<sub>2</sub>O; (b) Co(NO<sub>3</sub>)<sub>2</sub>·6H<sub>2</sub>O; (c) Cd(NO<sub>3</sub>)<sub>2</sub>·4H<sub>2</sub>O; (d) KNO<sub>3</sub>

Samples with different morphologies were obtained by using different nitrates, revealing that it is the metal cations that can react with WO<sub>3</sub>.

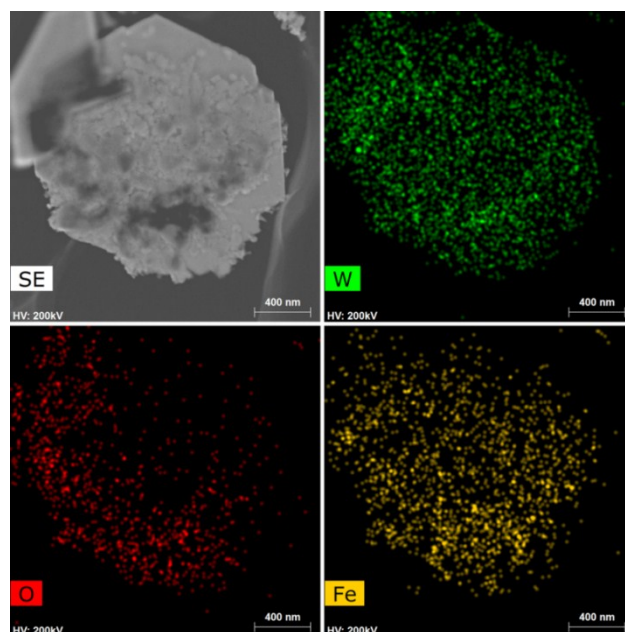

**Fig. S5** The EDX elemental mapping images of WFe0.20.

A large number of  $\text{Fe}_2\text{O}_3$  and  $\text{FeWO}_4$  nanoparticles homogeneously disperse in agglomerated species while some their clusters still disperse on the surface of hexagonal prisms.

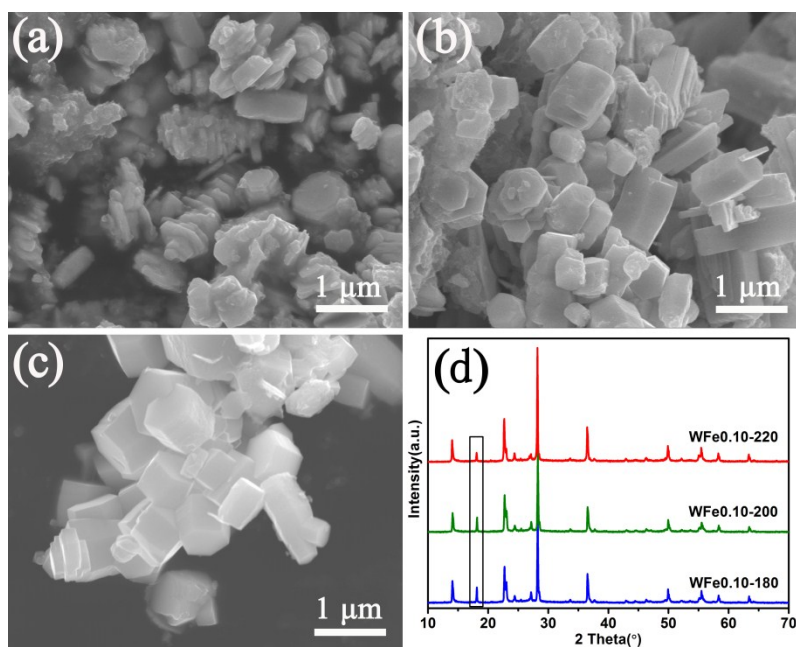

**Fig. S6** The SEM images of samples obtained at different temperature with pH 2.0 for 24 h. (a) 180 °C; (b) 200 °C; (c) 220 °C; (d) the XRD spectra of three samples.

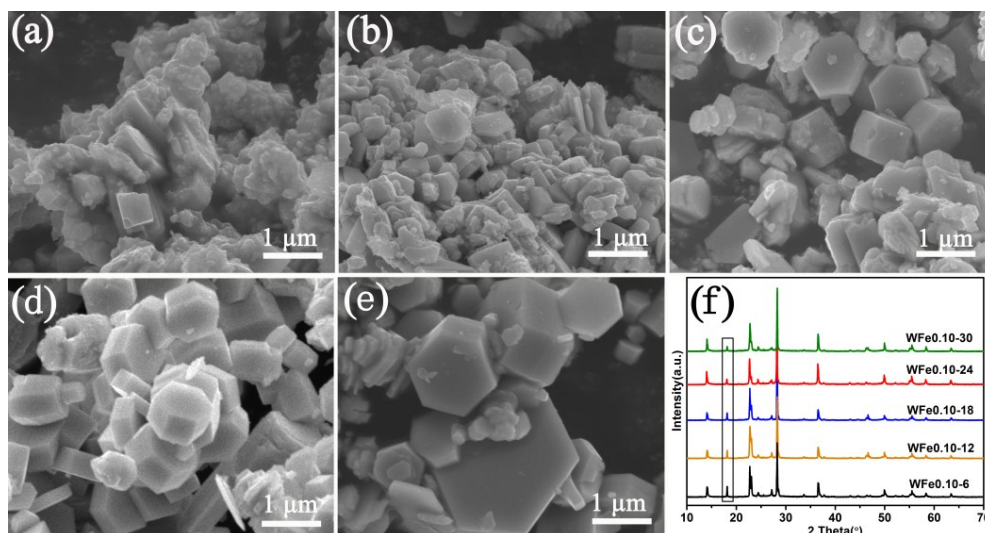

**Fig. S7** The SEM images of samples obtained with different reaction time at 220 °C and pH 2.0: (a)

6 h; (b) 12 h; (c) 18 h; (d) 24 h; (e) 30 h, (f) the XRD spectra of five samples.
